# Supplementary material for: Transcriptomic analysis of gene expression in mice treated with troxerutin
Source: PubMed Central journal article supplement (PMC5708793; doi:10.1371/journal.pone.0188261), 2017-11-30

# DE Gene Count

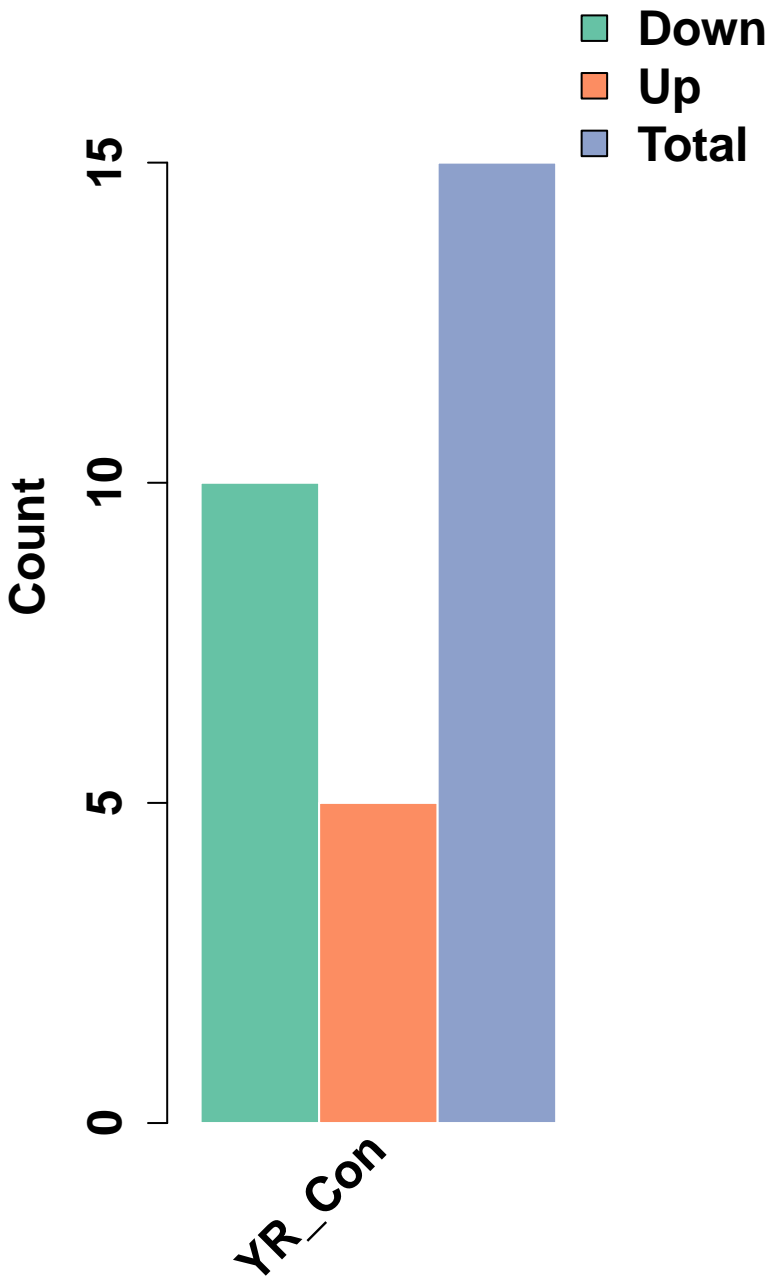

Supplement: pone.0188261.s002.pdf [file pone.0188261.s002.pdf]
